# Supplementary material
Source: PubMed Central journal article supplement (PMC7414063)
Supplement: pnas.2005341117.sapp.pdf [file pnas.2005341117.sapp.pdf]

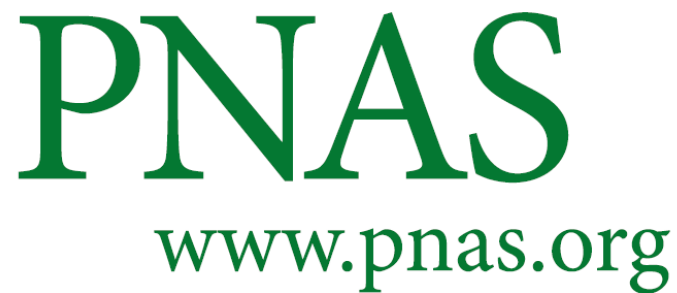

Supplementary Information for

**Molecular basis of Coxsackievirus A10 entry using the two-in-one attachment and uncoating receptor KRM1**

Yingzi Cui, Ruchao Peng, Hao Song, Zhou Tong, Xiao Qu, Sheng Liu, Xin Zhao, Yan Chai, Peiyi Wang, George F. Gao, and Jianxun Qi

Corresponding authors: George F. Gao & Jianxun Qi  
Email: [gaof@im.ac.cn](mailto:gaof@im.ac.cn) (G.F.G.); [jxqi@im.ac.cn](mailto:jxqi@im.ac.cn) (J.Q.)

**This PDF file includes:**

Supplementary text  
Figures S1 to S10  
Tables S1 to S2

## Supplementary Information:

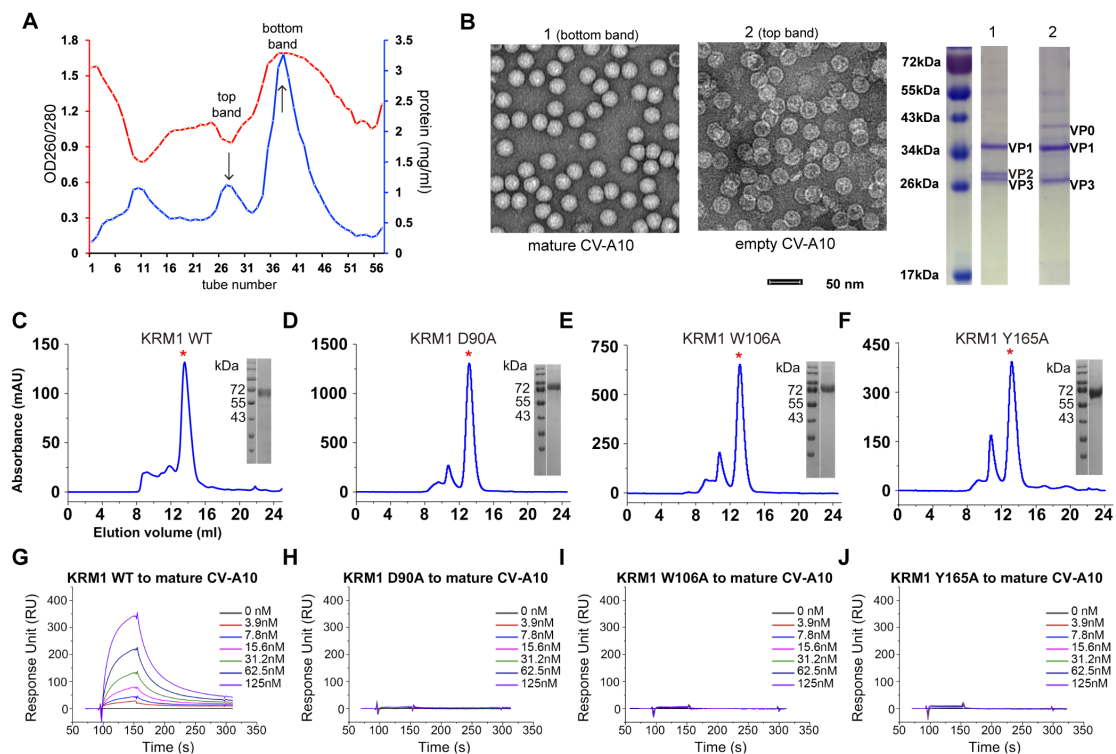

**Fig. S1. Purification and biochemical characterization of CV-A10 virus and KRM1 proteins.** (A) Virus quality test after sucrose gradient cushion purification. The two peaks (indicated by black arrows) were collected and subjected to further analysis. The first peak (top band) mainly consisted of empty capsid particles, and the second peak (bottom band) was mainly composed of mature virions with a high OD<sub>260/280</sub> absorbance ratio due to the presence of the RNA genome. (B) Negative-stain EM micrographs and SDS-PAGE profiles of the mature (lane 1) and empty (lane 2) CV-A10 viral particles. (C-F) SEC profiles of KRM1 proteins using a Superdex 200 10/300 GL column. Predicted monomeric molecules are eluted around 13.5 mL, labeled by a red asterisk, and peaks were then analyzed by SDS-PAGE. (G-J) The binding curves of KRM1 and its mutants to immobilized CV-A10 at physiological pH, corresponding to (C-F), respectively. The data were analyzed with BIAcore 3000 Evaluation software (GE Healthcare). The results shown are representatives of three independent experiments.

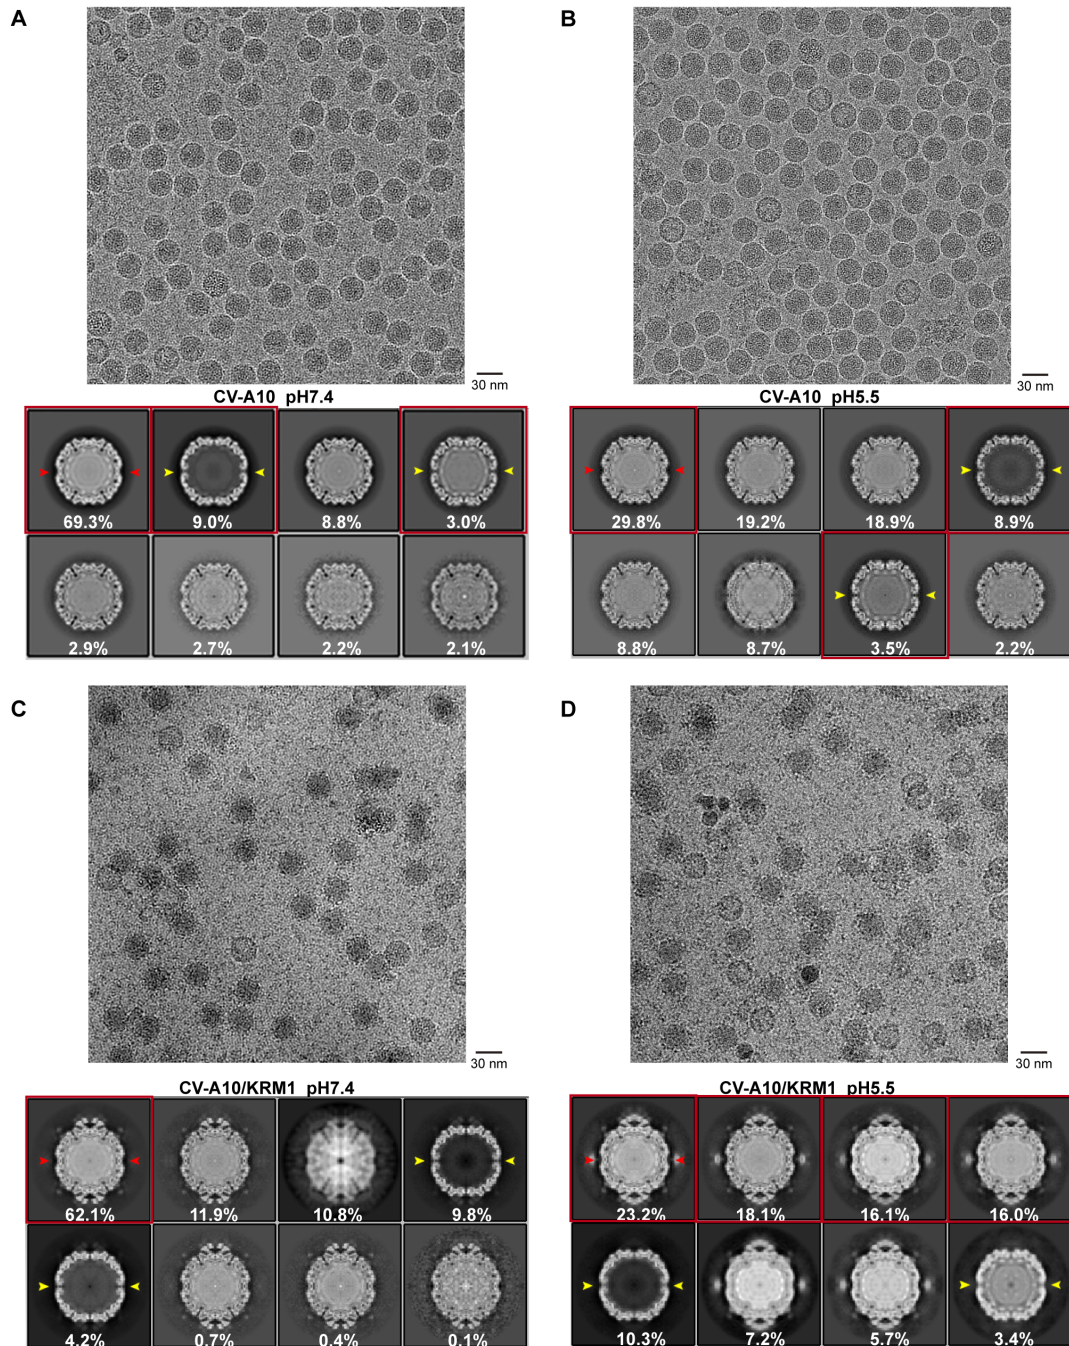

**Fig. S2. Cryo-EM images and 3D classification results of CV-A10 virus and its complex with KRM1. (A and B)** Representative micrographs (upper panel) and 3D class average images (lower panel) of CV-A10 particles at pH 7.4 (**A**) or pH 5.5 (**B**). A-particles and empty particles could be obviously distinguished from mature virus through the open

channels in the two-fold axis (indicates by yellow arrows), which were closed in the mature virus (red arrows). The virus preparation was mainly composed of mature virions (>80%). **(C and D)** Representative micrographs and 3D class average images of CV-A10 in the presence of KRM1 at pH 7.4 **(C)** or pH 5.5 **(D)**.

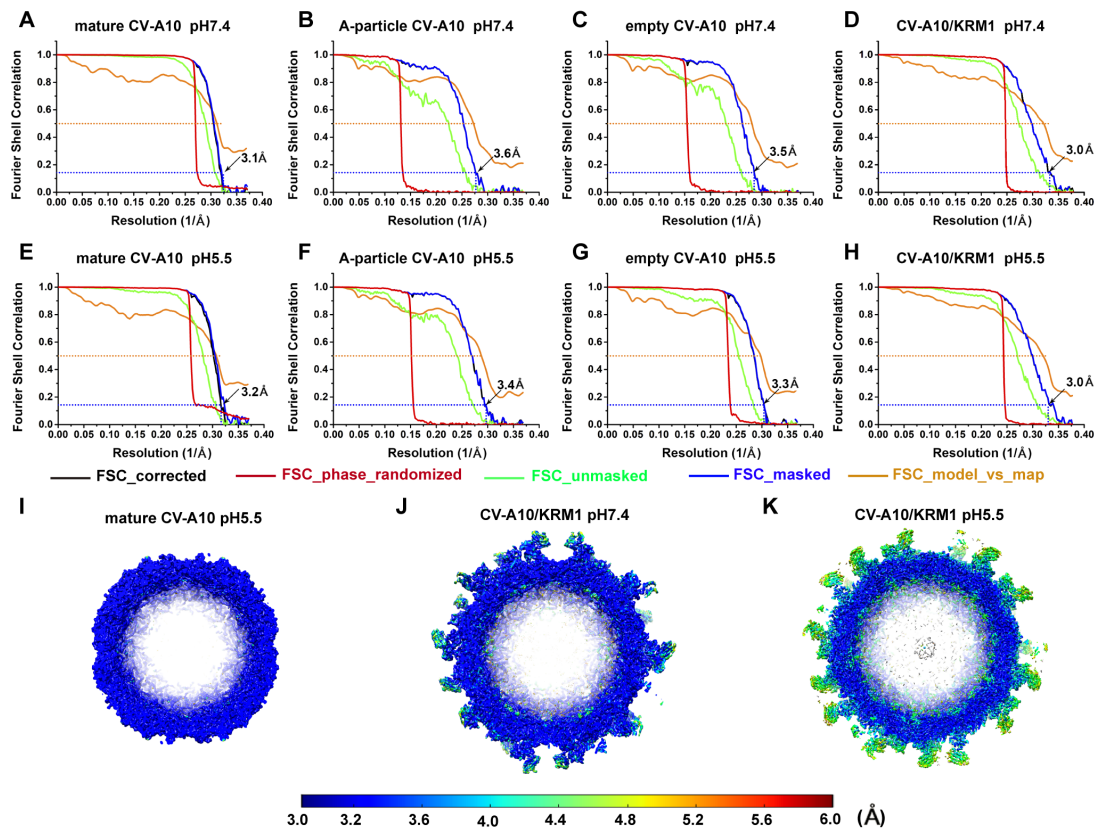

**Fig. S3. Resolution evaluations for EM maps of CV-A10 virus and its complex with KRM1.** (A-H) Fourier shell correlation (FSC) of the final 3D reconstruction obtained using gold-standard refinement in Relion. The 0.143 and 0.5 FSC cut-off values are indicated by blue and orange dashed lines, respectively. (I-K) Local resolution maps of representative density maps of CV-A10 virus or its complex with KRM1. In all of these structures, most core regions reached 3.0 Å and allowed the atomic details to be resolved.

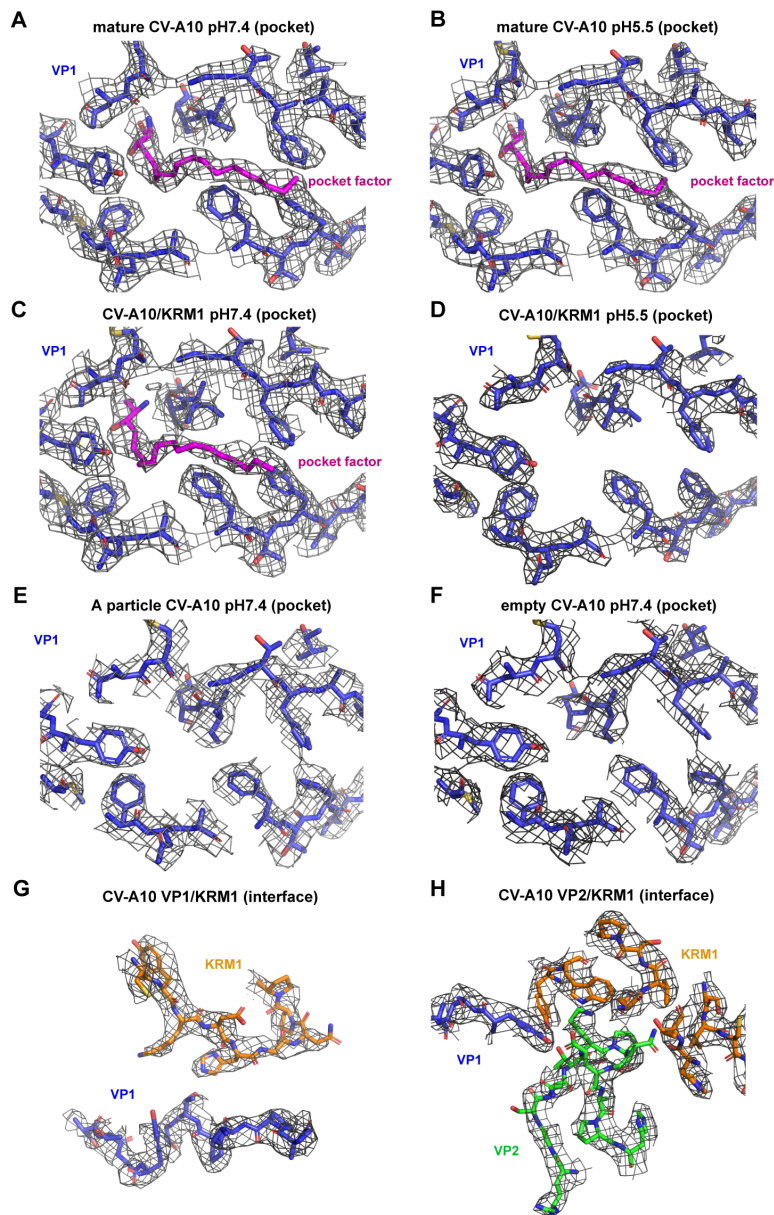

**Fig. S4. Representative density maps of the pocket region and receptor-binding interface. (A-B)** The "pocket factor" is preserved in structures of mature CV-A10 in both neutral and acidic conditions. **(C-D)** With receptor-binding, the occupancy of "pocket factor" is reduced at pH 7.4 and almost drops to zero at pH 5.5. **(E-F)** Collapsed pocket without "pocket factor" in A-particles and empty particle CV-A10 viruses. **(G-H)** In the receptor-binding interface, most side chains of key residues are resolved.

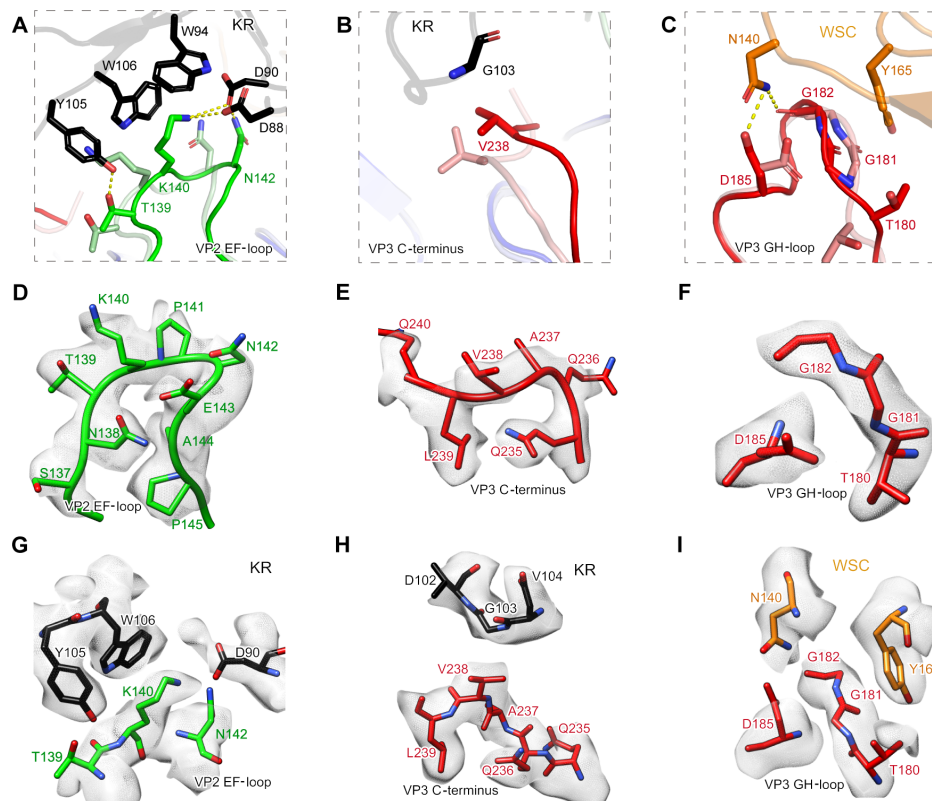

**Fig. S5. Details of conformational shifts of capsid proteins upon receptor binding.** (A-C) The interaction details depicting the reasons for conformational shifts caused by KRM1 binding. The proteins are colored by chains, and the critical interacting residues are displayed as sticks and colored by elements. Yellow dashed lines represent hydrogen bonds. (D-F) Cryo-EM density maps of mature CV-A10 viral capsid proteins at the receptor binding interface. (G-I) The density of corresponding contacting interface in the CV-A10/KRM1 complex at pH 7.4. Most of the amino acid side chains are clearly resolved in the density map. The interactions between contacting residues at the interface could be confidently defined.

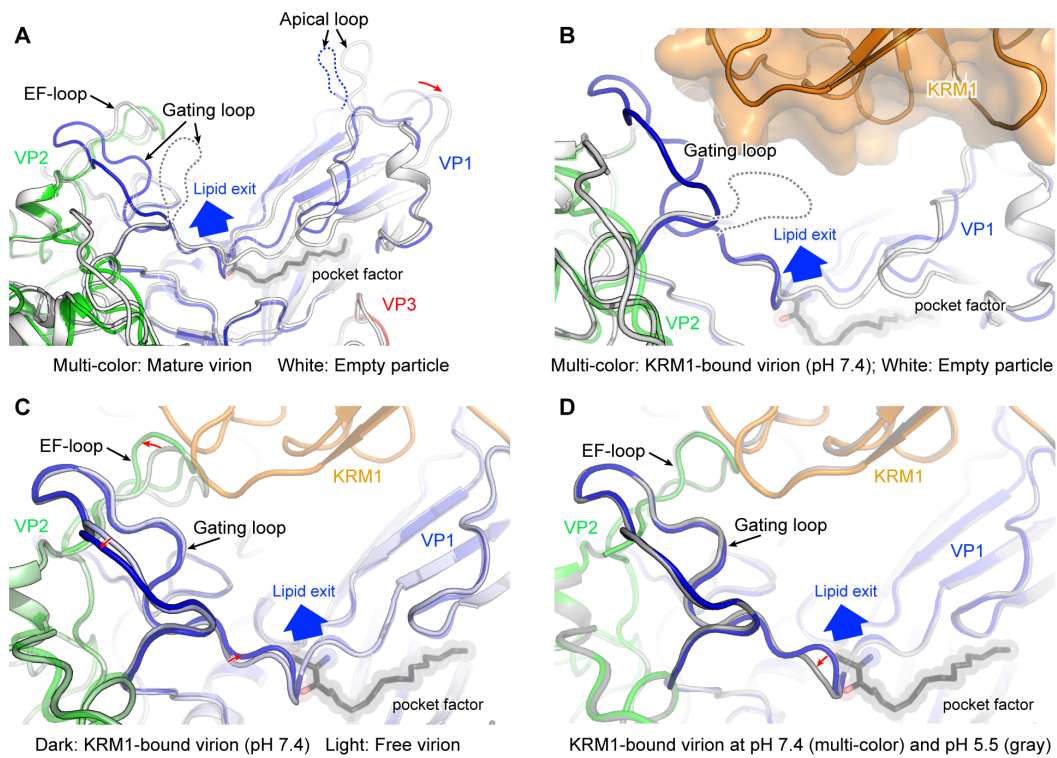

**Fig. S6. Structural comparison of CV-A10 viral particles at different states/conditions.** (A) Comparison of CV-A10 mature virion (colored by proteins) with the empty capsid (white) at pH 7.4. The VP2 EF-loop and the VP1 apical domain display different conformations between the two structures. The VP1 gating loop is disordered (gray dashed line) in the empty capsid in which the “pocket factor” is released. The lipid exit within the canyon is indicated by a thick blue arrow. (B) Overlay of empty capsid (white) with the KRM1-bound mature virion (colored by proteins) at pH 7.4. The KRM1-interacting gating loop is disordered in the empty capsid. (C) Comparison of CV-A10 mature virion with (dark colors) or without (light colors) KRM1 binding at pH 7.4. (D) Comparison of KRM1-bound CV-A10 virion at pH 7.4 (in multiple colors) and pH 5.5 (gray) conditions.



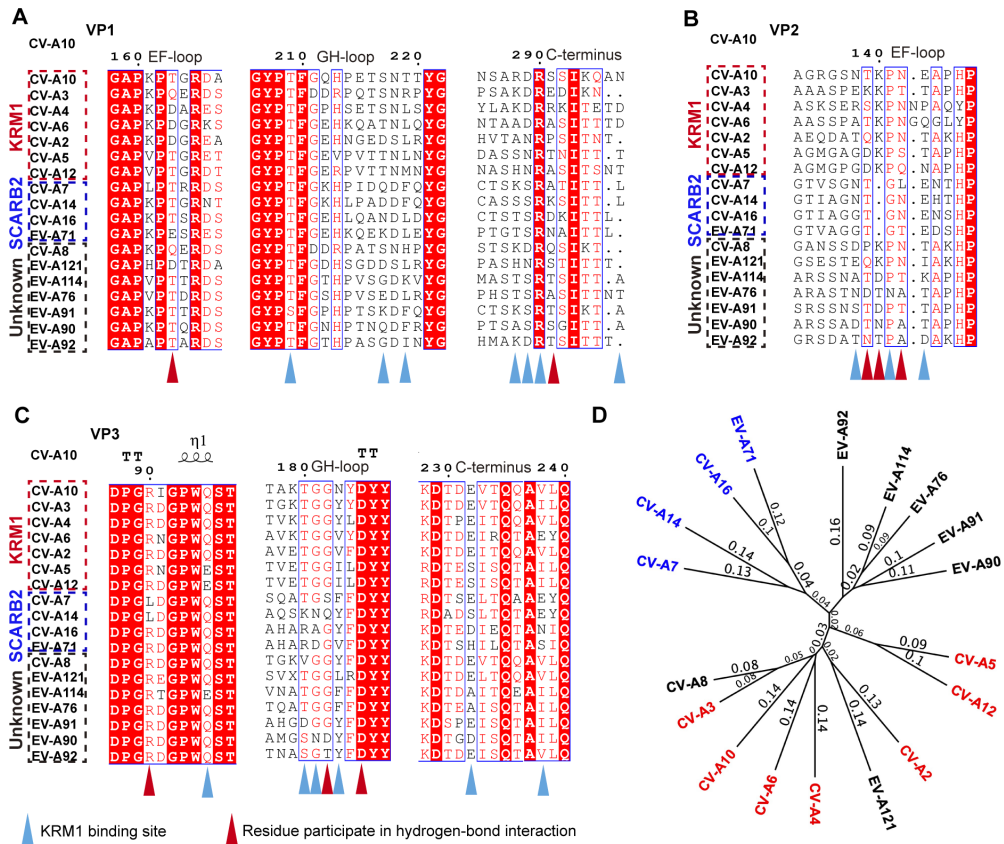

**Fig. S7. Sequence alignments of infectious EV-As around the KRM1 binding site of CV-A10. (A-C)** Symbolic epitomes of sequence alignment of CV-A10 VP1 (**A**), VP2 (**B**), and VP3 (**C**) in EV-As. The red triangles indicate amino acids that potentially participate in hydrogen-bond interactions with KRM1, while blue triangles indicate amino acids that contribute to other interaction patterns with KRM1. (**D**) Phylogenetic tree of the EV-As derived by comparing the P1 region (VP4, VP2, VP3, and VP1). Viruses using KRM1 and SCARB2 as receptors are highlighted in red and blue, respectively. GenBank Accession codes: CV-A10 (MT263729); CV-A3 (AY421761.1); CV-A4 (AY421762.1); CV-A6 (AY421764.1); CV-A2 (AY421760.1); CV-A5 (AY421763.1); CV-A12 (AY421768.1); CV-A7 (AY421765.1); CV-A14 (AY421769.1); CV-A16 (KM055004.1); EV-A71 (U22522.1); CV-A8 (AY421766.1); EV-A121 (NC\_030454.1); EV-A114 (KU355877.1); EV-A76 (JF905564.1); EV-A91 (AY697461.1); EV-A90 (JX390655.1); and EV-A92 (EF667344.1). The sequence alignment and the phylogenetic tree were produced by ESPript and Geneious.

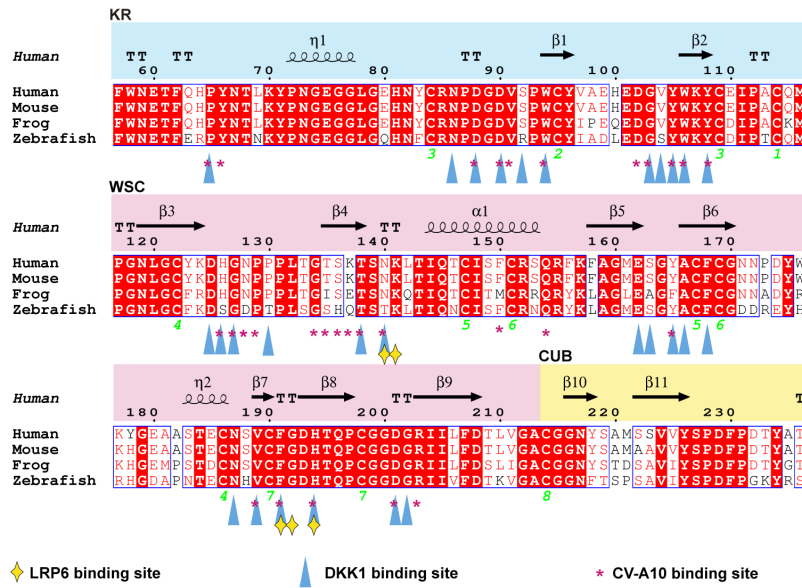

**Fig. S8. Secondary structures and sequence alignment of KRM1 in different species.** Residue numbering scheme based on that for human KRM1 and the secondary structure elements shown at the top of the alignment. The yellow diamond and blue triangle indicate LRP6 and DKK1 binding sites, respectively, and red asterisks highlight the CV-A10 binding site. Participating residues were analyzed by the contact program in CCP4 suite (the distance cutoff is 4.5 Å). GenBank Accession codes: KRM1 *Homo sapiens* (AAH63787); KRM1 *Mus musculus* (AAH82546); KRM1 *Xenopus laevis* (NP\_001082145); and KRM1 *Danio rerio* (NP\_001108389). The sequence alignment was produced by ESPript.

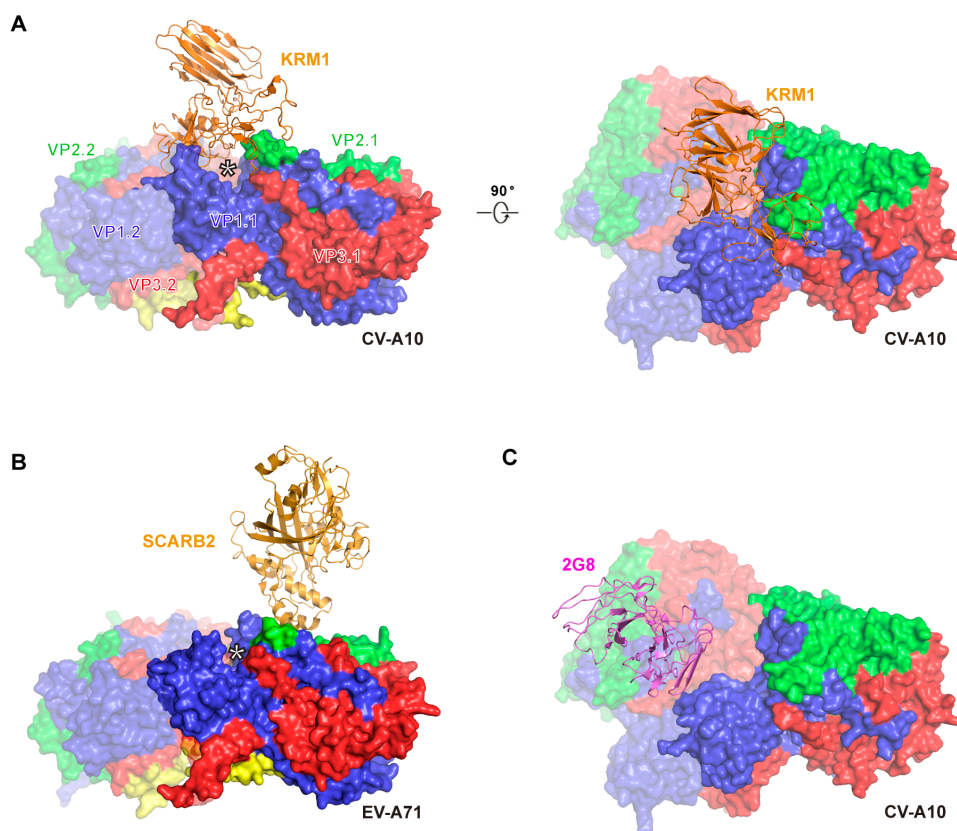

**Fig. S9. Structural comparisons of the CV-A10/KRM1 binding mode to the EV-A71/SCARB2 or CV-A10/2G8 fab complex.** (A) Side view (left) and top view (right) of the CV-A10/KRM1 complex, demonstrating the binding site of KRM1 to CV-A10. KRM1 binds to the top of the canyon, crossing two asymmetric units. (B) SCARB2 binds to the southern rim of the canyon. The canyon is highlighted with a white asterisk. (C) Epitope of 2G8 maps to all three capsid proteins (VP1 to VP3) in a single asymmetric unit. The viral proteins are shown in surface models (ASU.2 shown as a transparent surface), and the receptors/antibodies are shown as ribbons.

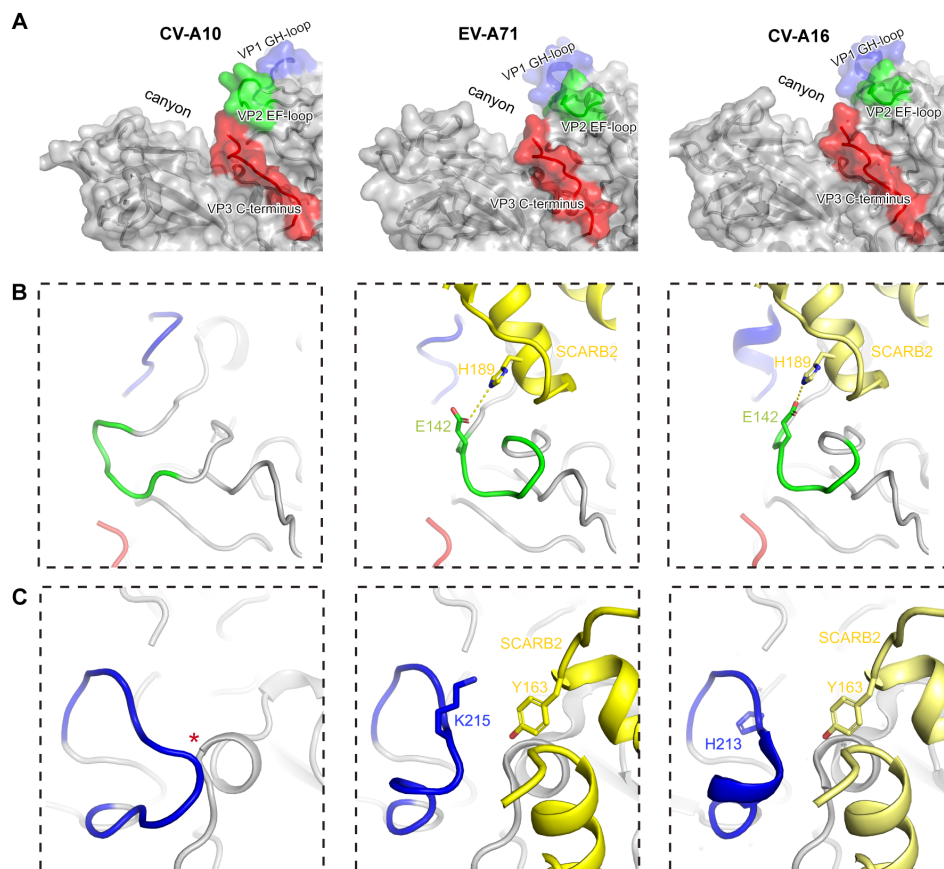

**Fig. S10. Structure comparison of CV-A10, EV-A71, and CV-A16 receptor binding sites.** (A) Surfaces of the viral capsid of CV-A10, EV-A71 (PDB: 6I2K), and CV-A16 (PDB: 5C4W) around the canyon walls. The VP1 GH-loop, VP2 EF-loop, and VP3 C-terminus are highlighted in blue, green, and red, respectively. (B and C) Close-up views of the VP2 EF-loop and VP1 GH-loop participating in the SCARB2 interaction. The SCARB2 is colored in yellow in the EV-A71/SCARB2 complex, and the aligned SCARB2 with CV-A16 is colored in pale yellow for distinction. The red asterisk highlights the possible steric hindrance imposed by the VP1 GH-loop in SCARB2-binding.

**Table S1. Cryo-EM data collection, refinement, and validation statistics.**

|                                                     | CV-A10<br>mature particle (pH7.4) | CV-A10<br>mature particle (pH5.5) |
|-----------------------------------------------------|-----------------------------------|-----------------------------------|
| <b>Data collection and processing</b>               |                                   |                                   |
| Magnification                                       | 37037                             | 37037                             |
| Voltage (kV)                                        | 300                               | 300                               |
| Electron exposure (e <sup>-</sup> /Å <sup>2</sup> ) | 40                                | 40                                |
| Defocus range (μm)                                  | -1.5 to -2.5                      | -1.5 to -2.5                      |
| Pixel size (Å)                                      | 1.35                              | 1.35                              |
| Symmetry imposed                                    | Icosahedral                       | Icosahedral                       |
| Initial particle images (no.)                       | 59833                             | 99876                             |
| Final particle images (no.)                         | 38570                             | 22864                             |
| Map resolution (Å)                                  | 3.1                               | 3.2                               |
| FSC threshold                                       | 0.143                             | 0.143                             |
| Map resolution range (Å)                            | 3.0-6.0                           | 3.0-6.0                           |
| <b>Refinement</b>                                   |                                   |                                   |
| Initial model used (PDB code)                       | 6ACU                              | 6ACU                              |
| Model resolution (Å)                                | 3.2                               | 3.2                               |
| Model resolution range (Å)                          | Up to 3.1                         | Up to 3.2                         |
| Map sharpening <i>B</i> factor (Å <sup>2</sup> )    | -141                              | -108                              |
| Model map FSC (masked)                              | 0.85                              | 0.82                              |
| Model composition                                   |                                   |                                   |
| Non-hydrogen atoms                                  | 6245                              | 6180                              |
| Protein residues                                    | 800                               | 793                               |
| Ligands                                             | 1                                 | 1                                 |
| <i>B</i> factors (Å <sup>2</sup> )                  |                                   |                                   |
| Protein                                             | 28                                | 30                                |
| Ligand                                              | 25                                | 27                                |
| R.m.s. deviations                                   |                                   |                                   |
| Bond lengths (Å)                                    | 0.003                             | 0.003                             |
| Bond angles (°)                                     | 0.65                              | 0.62                              |
| Validation                                          |                                   |                                   |
| MolProbity score                                    | 2.32                              | 2.24                              |
| Clashscore                                          | 7.39                              | 9.75                              |
| Poor rotamers (%)                                   | 5.57                              | 3.11                              |
| Ramachandran plot                                   |                                   |                                   |
| Favored (%)                                         | 94.94                             | 94.88                             |
| Allowed (%)                                         | 4.94                              | 4.99                              |
| Disallowed (%)                                      | 0.12                              | 0.13                              |

**Table S1. Cryo-EM data collection, refinement, and validation statistics (continued).**

|                                                     | CV-A10<br>A-particle (pH7.4) | CV-A10<br>A-particle (pH5.5) |
|-----------------------------------------------------|------------------------------|------------------------------|
| <b>Data collection and processing</b>               |                              |                              |
| Magnification                                       | 37037                        | 37037                        |
| Voltage (kV)                                        | 300                          | 300                          |
| Electron exposure (e <sup>-</sup> /Å <sup>2</sup> ) | 40                           | 40                           |
| Defocus range (μm)                                  | -1.5 to -2.5                 | -1.5 to -2.5                 |
| Pixel size (Å)                                      | 1.35                         | 1.35                         |
| Symmetry imposed                                    | Icosahedral                  | Icosahedral                  |
| Initial particle images (no.)                       | 59833                        | 99876                        |
| Final particle images (no.)                         | 1786                         | 2940                         |
| Map resolution (Å)                                  | 3.6                          | 3.4                          |
| FSC threshold                                       | 0.143                        | 0.143                        |
| Map resolution range (Å)                            | 3.0-6.0                      | 3.0-6.0                      |
| <b>Refinement</b>                                   |                              |                              |
| Initial model used (PDB code)                       | 6ACU                         | 6ACU                         |
| Model resolution (Å)                                | 3.7                          | 3.5                          |
| Model resolution range (Å)                          | Up to 3.6                    | Up to 3.4                    |
| Map sharpening <i>B</i> factor (Å <sup>2</sup> )    | -96                          | -98                          |
| Model map FSC (masked)                              | 0.85                         | 0.85                         |
| Model composition                                   |                              |                              |
| Non-hydrogen atoms                                  | 5109                         | 5141                         |
| Protein residues                                    | 653                          | 656                          |
| Ligands                                             | 0                            | 0                            |
| <i>B</i> factors (Å <sup>2</sup> )                  |                              |                              |
| Protein                                             | 50                           | 34                           |
| Ligand                                              | -                            | -                            |
| R.m.s. deviations                                   |                              |                              |
| Bond lengths (Å)                                    | 0.003                        | 0.004                        |
| Bond angles (°)                                     | 0.63                         | 0.69                         |
| Validation                                          |                              |                              |
| MolProbity score                                    | 2.26                         | 2.52                         |
| Clashscore                                          | 11.47                        | 8.75                         |
| Poor rotamers (%)                                   | 2.14                         | 7.28                         |
| Ramachandran plot                                   |                              |                              |
| Favored (%)                                         | 93.27                        | 94.10                        |
| Allowed (%)                                         | 6.57                         | 5.75                         |
| Disallowed (%)                                      | 0.16                         | 0.15                         |

**Table S1. Cryo-EM data collection, refinement, and validation statistics (continued).**

|                                                     | CV-A10<br>empty particle (pH7.4) | CV-A10<br>empty particle (pH5.5) |
|-----------------------------------------------------|----------------------------------|----------------------------------|
| <b>Data collection and processing</b>               |                                  |                                  |
| Magnification                                       | 37037                            | 37037                            |
| Voltage (kV)                                        | 300                              | 300                              |
| Electron exposure (e <sup>-</sup> /Å <sup>2</sup> ) | 40                               | 40                               |
| Defocus range (μm)                                  | -1.5 to -2.5                     | -1.5 to -2.5                     |
| Pixel size (Å)                                      | 1.35                             | 1.35                             |
| Symmetry imposed                                    | Icosahedral                      | Icosahedral                      |
| Initial particle images (no.)                       | 59833                            | 99876                            |
| Final particle images (no.)                         | 5179                             | 8877                             |
| Map resolution (Å)                                  | 3.5                              | 3.3                              |
| FSC threshold                                       | 0.143                            | 0.143                            |
| Map resolution range (Å)                            | 3.0-6.0                          | 3.0-6.0                          |
| <b>Refinement</b>                                   |                                  |                                  |
| Initial model used (PDB code)                       | 6ACU                             | 6ACU                             |
| Model resolution (Å)                                | 3.5                              | 3.3                              |
| Model resolution range (Å)                          | Up to 3.5                        | Up to 3.3                        |
| Map sharpening <i>B</i> factor (Å <sup>2</sup> )    | -114                             | -116                             |
| Model map FSC (masked)                              | 0.85                             | 0.86                             |
| Model composition                                   |                                  |                                  |
| Non-hydrogen atoms                                  | 4998                             | 5000                             |
| Protein residues                                    | 639                              | 637                              |
| Ligands                                             | 0                                | 0                                |
| <i>B</i> factors (Å <sup>2</sup> )                  |                                  |                                  |
| Protein                                             | 38                               | 31                               |
| Ligand                                              | -                                | -                                |
| R.m.s. deviations                                   |                                  |                                  |
| Bond lengths (Å)                                    | 0.003                            | 0.003                            |
| Bond angles (°)                                     | 0.64                             | 0.64                             |
| Validation                                          |                                  |                                  |
| MolProbity score                                    | 2.37                             | 2.38                             |
| Clashscore                                          | 7.28                             | 8.19                             |
| Poor rotamers (%)                                   | 5.11                             | 5.47                             |
| Ramachandran plot                                   |                                  |                                  |
| Favored (%)                                         | 93.46                            | 94.54                            |
| Allowed (%)                                         | 6.38                             | 5.30                             |
| Disallowed (%)                                      | 0.16                             | 0.16                             |

**Table S1. Cryo-EM data collection, refinement, and validation statistics (continued).**

|                                                     | CV-A10 bound to KRM1<br>(pH 7.4) | CV-A10 bound to KRM1<br>(pH 5.5) |
|-----------------------------------------------------|----------------------------------|----------------------------------|
| <b>Data collection and processing</b>               |                                  |                                  |
| Magnification                                       | 37879                            | 37879                            |
| Voltage (kV)                                        | 200                              | 200                              |
| Electron exposure (e <sup>-</sup> /Å <sup>2</sup> ) | 40                               | 40                               |
| Defocus range (μm)                                  | -1.5 to -2.5                     | -1.5 to -2.5                     |
| Pixel size (Å)                                      | 1.32                             | 1.32                             |
| Symmetry imposed                                    | Icosahedral                      | Icosahedral                      |
| Initial particle images (no.)                       | 46698                            | 25058                            |
| Final particle images (no.)                         | 28084                            | 17659                            |
| Map resolution (Å)                                  | 3.0                              | 3.0                              |
| FSC threshold                                       | 0.143                            | 0.143                            |
| Map resolution range (Å)                            | 3.0-6.0                          | 3.0-6.0                          |
| <b>Refinement</b>                                   |                                  |                                  |
| Initial model used (PDB code)                       | 6ACU, 5FWS                       | 6ACU, 5FWS                       |
| Model resolution (Å)                                | 3.1                              | 3.1                              |
| Model resolution range (Å)                          | Up to 3.0                        | Up to 3.0                        |
| Map sharpening <i>B</i> factor (Å <sup>2</sup> )    | -107                             | -88                              |
| Model map FSC (masked)                              | 0.84                             | 0.85                             |
| Model composition                                   |                                  |                                  |
| Non-hydrogen atoms                                  | 8586                             | 8557                             |
| Protein residues                                    | 1094                             | 1093                             |
| Ligands                                             | 4                                | 3                                |
| <i>B</i> factors (Å <sup>2</sup> )                  |                                  |                                  |
| Protein                                             | 33                               | 50                               |
| Ligand                                              | 60                               | 98                               |
| R.m.s. deviations                                   |                                  |                                  |
| Bond lengths (Å)                                    | 0.003                            | 0.003                            |
| Bond angles (°)                                     | 0.59                             | 0.56                             |
| Validation                                          |                                  |                                  |
| MolProbity score                                    | 2.49                             | 2.28                             |
| Clashscore                                          | 8.69                             | 6.33                             |
| Poor rotamers (%)                                   | 6.05                             | 4.65                             |
| Ramachandran plot                                   |                                  |                                  |
| Favored (%)                                         | 93.36                            | 93.54                            |
| Allowed (%)                                         | 6.55                             | 6.37                             |
| Disallowed (%)                                      | 0.09                             | 0.09                             |



**Table S2. Atomic contacts between KRM1 and CV-A10 VPs at pH 5.5.**

| <b>KRM1</b> | <b>Contacts</b> | <b>VP1.1</b>     | <b>Total Contacts</b> |
|-------------|-----------------|------------------|-----------------------|
| H126        | 3*              | T163(1)^         | 9                     |
| N140        | 1               | T209             |                       |
| H194        | 4, 1            | S217, T219       |                       |
| <b>KRM1</b> | <b>Contacts</b> | <b>VP2.1</b>     | <b>Total Contacts</b> |
| P65         | 1               | N138             | 32                    |
| Y66         | 5               | E143             |                       |
| D88         | 2, 5            | K140(1), E143    |                       |
| D90         | 1, 5            | K140(1), N142(1) |                       |
| Y105        | 4, 1            | T139(1), K140    |                       |
| W106        | 7, 1            | K140, P141       |                       |
| <b>KRM1</b> | <b>Contacts</b> | <b>VP3.1</b>     | <b>Total Contacts</b> |
| G103        | 4               | V238             | 4                     |
| <b>KRM1</b> | <b>Contacts</b> | <b>VP1.2</b>     | <b>Total Contacts</b> |
| G127        | 1               | R288             | 22                    |
| N128        | 5               | R288             |                       |
| G134        | 2               | D289             |                       |
| T135        | 1               | D289, R290       |                       |
| S136        | 2               | D289             |                       |
| T138        | 6               | N297             |                       |
| F150        | 1               | S291             |                       |
| Q154        | 4               | S291(1)          |                       |
| <b>KRM1</b> | <b>Contacts</b> | <b>VP3.2</b>     | <b>Total Contacts</b> |
| H126        | 4               | T234             | 40                    |
| G127        | 5               | T234             |                       |
| N128        | 7               | E232             |                       |
| T138        | 1               | R90(1)           |                       |

|      |         |                  |  |
|------|---------|------------------|--|
| N140 | 3, 4    | G182(1), D185(1) |  |
| Y165 | 1, 6, 7 | T180, G181, G182 |  |
| F191 | 2       | N183             |  |

\*Numbers represent the number of atom-to-atom contacts between the KRM1 residues and CV-A10 VP residues, which were analyzed by the contact program in the CCP4 suite (the distance cutoff was 4.0 Å).

^Numbers in the parentheses represent the number of potential hydrogen bonds between the nitrogen and oxygen atoms is less than 3.5 Å.
